# Supplementary material for: Facilely prepared carbon dots and rare earth ion doped hybrid composites for ratio-metric pH sensing and white-light emission
Source: Royal Society of Chemistry journal article supplement (doi:10.1039/c6ra11386a), 2016-01-01
Supplement: c6ra11386a1.pdf [file c6ra11386a1.pdf]

# Supporting Information

## **Facilely prepared carbon dots and rare earth ions doped hybrid composites for ratio-metric pH sensing and white- light emission**

*Tianxiang Zhang, Yue Zhai, He Wang, Jinyang Zhu, Lin Xu, Biao Dong\*, Hongwei Song.\**

*State Key Laboratory on Integrated Optoelectronics, College of Electronic Science and Engineering, Jilin University, 2699 Qianjin Street, Changchun, 130012, People's Republic of China.*

*E-mail: songhw@jlu.edu.cn.*

*Tel: +86-431-85155129*

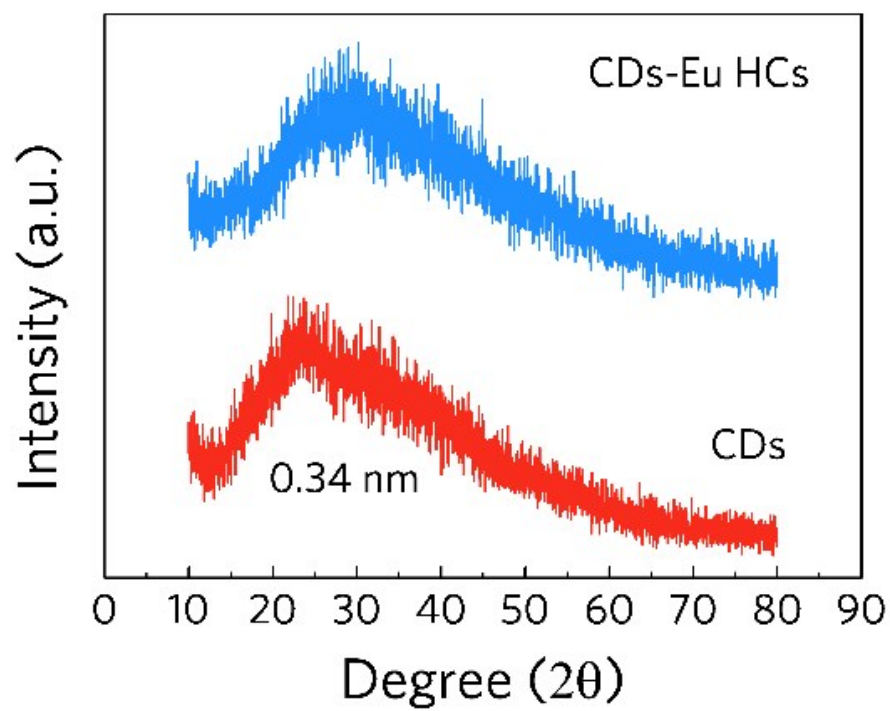

Figure S1. XRD patterns of prepared CDs-Eu-HCs composites and pure CDs.

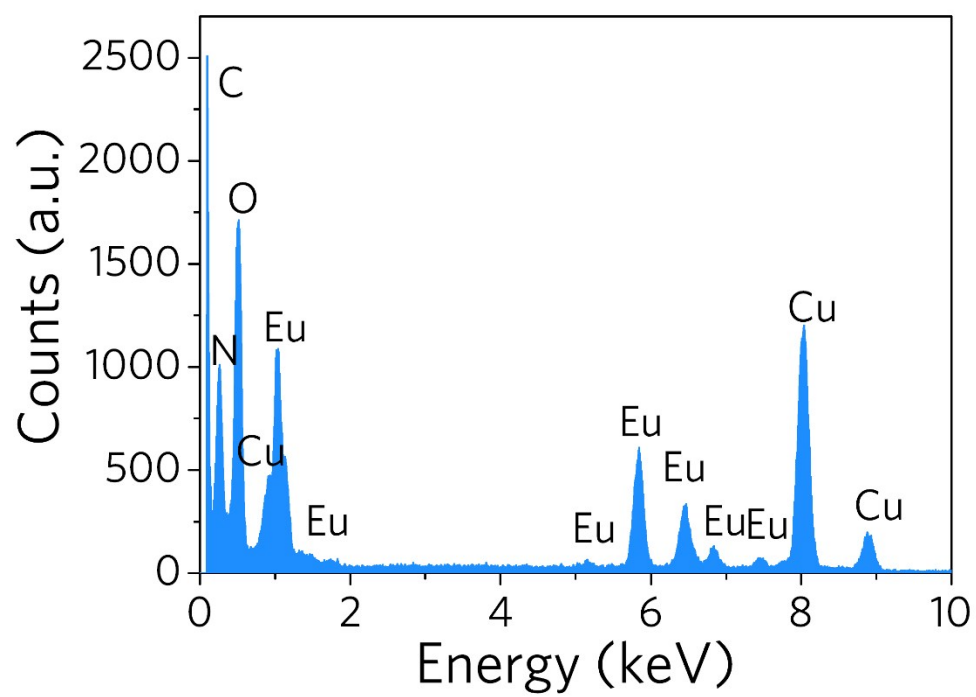

Figure S2. The EDX elements integral distribution of CDs-Eu-HCs.

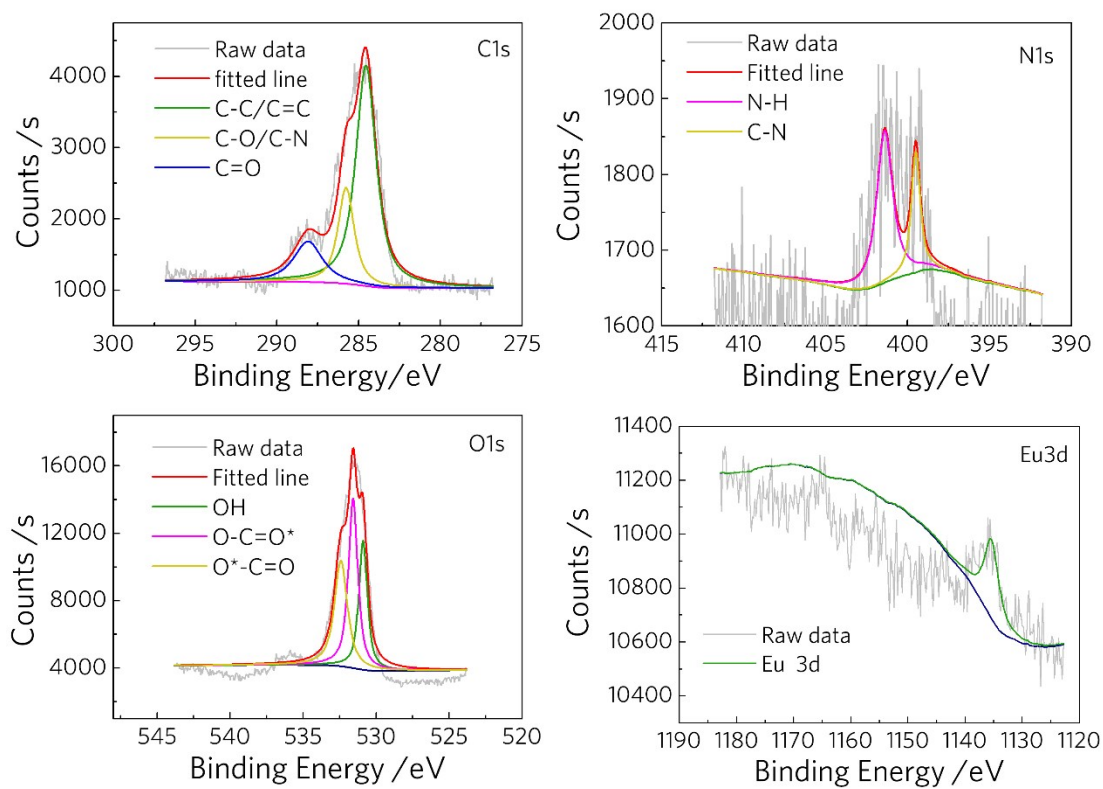

Figure S3. High resolution XPS spectra of (a) C1s, (b) N1s, (c) O1s and (d) Eu 3d of CDs-Eu-HCs, respectively.

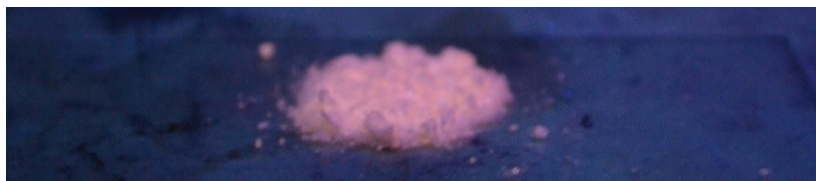

Figure S4. The digital photos of the prepared CDs-TbEu<sub>0.2</sub> composites in solid states under the UV light (365 nm).
